# Supplementary material for: Molecular clusters in aqueous solutions of pyridine and its methyl derivatives
Source: Royal Society of Chemistry journal article supplement (doi:10.1039/c0cp02771e), 2011-01-01
Supplement: c0cp02771e.pdf [file c0cp02771e.pdf]

Supplementary information to “**Molecular clusters in aqueous solutions of pyridine and its methyl derivatives**” by W. Marczak, B. Czech, L. Almásy and D. Lairez

Coefficients of the polynomials (eq. 3) for density of binary systems in the temperature limits (278.15 – 323.15) K and standard deviations of the fit  $\delta$

2,6-dimethylpyridine (1) + methanol (2)

| $x_1$  | $a_0$   | $a_1 \times 10$ | $a_2 \times 10^4$ | $\delta$ |
|--------|---------|-----------------|-------------------|----------|
| 0      | 786.560 | -9.453          | -4.148            | 0.016    |
| 0.0200 | 796.041 | -9.466          | -4.312            | 0.016    |
| 0.0600 | 813.082 | -9.497          | -4.455            | 0.014    |
| 0.0995 | 827.841 | -9.528          | -4.650            | 0.013    |
| 0.2001 | 857.136 | -9.585          | -4.794            | 0.012    |
| 0.2999 | 877.587 | -9.583          | -4.694            | 0.011    |
| 0.3997 | 891.611 | -9.511          | -4.739            | 0.010    |
| 0.4991 | 901.167 | -9.398          | -4.856            | 0.008    |
| 0.5990 | 907.613 | -9.278          | -4.811            | 0.008    |
| 0.7007 | 912.055 | -9.172          | -4.642            | 0.006    |
| 0.8006 | 914.976 | -9.094          | -4.296            | 0.006    |
| 0.8989 | 916.865 | -9.037          | -3.959            | 0.006    |
| 1      | 918.015 | -9.004          | -3.434            | 0.005    |

2-methylpyridine (1) + methanol (2)

| $x_1$  | $a_0$   | $a_1 \times 10$ | $a_2 \times 10^4$ | $\delta$ |
|--------|---------|-----------------|-------------------|----------|
| 0      | 786.556 | -9.453          | -4.150            | 0.015    |
| 0.0200 | 795.290 | -9.476          | -4.294            | 0.015    |
| 0.0599 | 811.398 | -9.518          | -4.468            | 0.014    |
| 0.0998 | 825.780 | -9.556          | -4.639            | 0.013    |
| 0.1992 | 855.337 | -9.625          | -4.697            | 0.012    |
| 0.3000 | 877.694 | -9.640          | -4.555            | 0.010    |
| 0.3993 | 894.479 | -9.612          | -4.487            | 0.010    |
| 0.4817 | 904.912 | -9.571          | -4.334            | 0.009    |
| 0.6003 | 916.912 | -9.502          | -4.053            | 0.009    |
| 0.6994 | 924.487 | -9.451          | -3.803            | 0.007    |
| 0.7965 | 930.499 | -9.410          | -3.446            | 0.006    |
| 0.8993 | 935.268 | -9.381          | -3.009            | 0.005    |
| 1      | 939.115 | -9.361          | -2.450            | 0.006    |

pyridine (1) + methanol (2)

| $x_1$  | $a_0$   | $a_1 \times 10$ | $a_2 \times 10^4$ | $\delta$ |
|--------|---------|-----------------|-------------------|----------|
| 0      | 786.519 | -9.454          | -4.146            | 0.017    |
| 0.0200 | 795.038 | -9.487          | -4.271            | 0.016    |
| 0.0600 | 810.982 | -9.551          | -4.474            | 0.015    |
| 0.1000 | 825.565 | -9.609          | -4.544            | 0.013    |
| 0.2000 | 857.164 | -9.720          | -4.737            | 0.013    |
| 0.3000 | 882.846 | -9.789          | -4.695            | 0.010    |
| 0.4001 | 903.980 | -9.827          | -4.620            | 0.010    |
| 0.4999 | 921.485 | -9.856          | -4.306            | 0.008    |
| 0.5997 | 936.223 | -9.882          | -4.026            | 0.007    |
| 0.6999 | 948.936 | -9.914          | -3.612            | 0.007    |
| 0.7999 | 959.863 | -9.957          | -3.223            | 0.009    |
| 0.8989 | 969.395 | -10.011         | -2.563            | 0.007    |
| 1      | 978.034 | -10.083         | -1.860            | 0.004    |

pyridine (1) + water (2)

| $x_1$  | $a_0$    | $a_1 \times 10$ | $a_2 \times 10^4$ | $a_3 \times 10^5$ | $\delta$ |
|--------|----------|-----------------|-------------------|-------------------|----------|
| 0.0100 | 998.184  | -3.033          | -45.853           | 2.472             | 0.008    |
| 0.0200 | 999.176  | -3.527          | -41.696           | 2.026             | 0.006    |
| 0.0400 | 1000.573 | -4.388          | -34.486           | 1.308             | 0.004    |
| 0.0600 | 1001.501 | -5.088          | -29.353           | 0.467             | 0.012    |
| 0.0800 | 1002.151 | -5.672          | -25.297           | 0.487             | 0.002    |
| 0.1000 | 1002.652 | -6.170          | -21.817           |                   | 0.007    |
| 0.2000 | 1003.584 | -7.879          | -13.793           |                   | 0.004    |
| 0.3000 | 1002.757 | -8.792          | -10.911           |                   | 0.005    |
| 0.4000 | 1000.343 | -9.286          | -9.820            |                   | 0.005    |
| 0.5000 | 996.583  | -9.524          | -9.206            |                   | 0.003    |
| 0.6000 | 992.141  | -9.642          | -8.384            |                   | 0.004    |
| 0.7000 | 987.755  | -9.751          | -6.871            |                   | 0.005    |
| 0.8000 | 983.810  | -9.867          | -5.043            |                   | 0.007    |
| 0.9000 | 980.477  | -9.982          | -3.348            |                   | 0.006    |
| 1      | 978.038  | -10.084         | -1.748            |                   | 0.006    |
